# Supplementary material for: Design of a Targeted Amplicon Sequencing Panel for Detection of Foodborne Pathogens and its Application in Detection of Spiked Shiga Toxin-Producing Escherichia coli in Romaine Lettuce
Source: Research Square preprint supplement (doi:10.21203/rs.3.rs-6805163/v1), 2025-06-12
Supplement: Supplementary file 1 [file 50afb8a099f45c5ee41b98cc.docx]

Table 3. Comparative analysis of WMS and TAS methods for the detection of STEC strains (O157:H7, O26:H11, and O121:H19) under varying CFU and time points.

| **Unspiked** | | Total Read Count | | Average Read length (bp) | | *E.coli Reads* (Kraken) | | *stx1/stx2* | |
| --- | --- | --- | --- | --- | --- | --- | --- | --- | --- |
| **CFU** | **Time (h)** | WMS | TAS | WMS | TAS | WMS | TAS | WMS | TAS |
| 0 | 0.5 | 618752 | ND | 251 | ND | 77 | ND | - | ND |
| 0 | 5 | 2022178 | ND | 228 | ND | - | ND | - | ND |

| **O157:H7** | | Total Read Count | | Average Read length (bp) | | *E.coli Reads* (Kraken) | | *stx2* | |
| --- | --- | --- | --- | --- | --- | --- | --- | --- | --- |
| **CFU** | **Time (h)** | WMS | TAS | WMS | TAS | WMS | TAS | WMS | TAS |
| 1000 | 0.5 | 2397124 | 36630 | 220.1 | 242 | 692 | 3740 | - | + |
| 100 | 0.5 | 2054432 | 42670 | 222.8 | 235 | 96 | 3164 | - | + |
| 10 | 0.5 | 1872720 | 112402 | 238.3 | 211 | 177 | 196 | - | + |
| 1000 | 5 | 619870 | 185408 | 250.6 | 241 | 179112 | 842143 | + | + |
| 100 | 5 | 667068 | 736492 | 250.6 | 221 | 205331 | 46158 | + | + |
| 10 | 5 | 563628 | 861678 | 250.7 | 220 | 69658 | 1274 | - | + |
| 1000 | 6 | 2816922 | 2171138 | 234 | 251 | 317214 | 344640 | + | + |
| 100 | 6 | 1939090 | 1775322 | 232.5 | 251 | 260364 | 200954 | + | + |
| 10 | 6 | 1774236 | 1278908 | 235.6 | 250 | 42594 | 241744 | + | + |

| **O26:H11** | | Total Read Count | | Average Read length (bp) | | *E. coli* Reads (Kraken) | | *stx2* | |
| --- | --- | --- | --- | --- | --- | --- | --- | --- | --- |
| **CFU/225 ml** | **Time (h)** | WMS | TAS | WMS | TAS | WMS | TAS | WMS | TAS |
| 1000 | 0.5 | 1461300 | 2030560 | 154 | 80 | 124 | 79 | - | + |
| 100 | 0.5 | 1739294 | 3546366 | 91 | 82 | 30 | 44 | - | + |
| 10 | 0.5 | 1263392 | 3953726 | 191 | 84 | 13 | 126 | - | + |
| 1000 | 5 | 457972 | 1849876 | 237 | 251 | 188485 | 109077 | + | + |
| 100 | 5 | 454452 | 1666900 | 237 | 250 | 138166 | 120753 | + | + |
| 10 | 5 | 624290 | 997256 | 227 | 246 | 7364 | 50481 | - | + |
| 1000 | 6 | 899548 | 1951988 | 243 | 251 | 163409 | 128340 | + | + |
| 100 | 6 | 766086 | 1034306 | 227 | 250 | 152518 | 134995 | + | + |
| 10 | 6 | 485546 | 1300076 | 236 | 250 | 23922 | 89705 | + | + |

| **O121:H19** | | Total Read Count | | Average Read length (bp) | | *E. coli* Reads (Kraken) | | *stx2* | |
| --- | --- | --- | --- | --- | --- | --- | --- | --- | --- |
| **CFU/225 ml** | **Time (h)** | WMS | TAS | WMS | TAS | WMS | TAS | WMS | TAS |
| 1000 | 0.5 | 804206 | 1146408 | 210 | 251 | 31 | 517 | - | + |
| 100 | 0.5 | 705818 | 1380518 | 217 | 251 | 23 | 11 | - | + |
| 10 | 0.5 | 1565704 | 1273856 | 209 | 251 | 77 | 3628 | - | + |
| 1000 | 5 | 2078380 | 855630 | 227 | 251 | 11066 | 34351 | + | + |
| 100 | 5 | 8967228 | 1338472 | 181 | 251 | 826 | 20983 | + | + |
| 10 | 5 | 3025906 | 1996282 | 234 | 251 | 100 | 1547 | - | + |
| 1000 | 6 | 2930572 | 733832 | 238 | 246 | 23320 | 101328 | + | + |
| 100 | 6 | 3963632 | 1260550 | 224 | 251 | 703 | 23770 | + | + |
| 10 | 6 | 1183614 | 1005614 | 246 | 251 | 234 | 175 | - | + |

The table summarizes the total read counts, average read length (bp), number of *E. coli* reads per million, and detection of *stx1/stx2* genes across different *E. coli* strains analyzed using WMS sequencing and TAS. Data were collected at multiple time points (0.5 h, 5 h, and 6 h) from 25 ml of the cultures obtained from romaine lettuce spiked with 1000, 100, and 10 STEC CFU. Unspiked samples were used as controls. (ND) Not done. The presence (+) or absence (-) of *stx1* and *stx2* genes is noted for each strain.
