# Supplementary material for: Design of a Targeted Amplicon Sequencing Panel for Detection of Foodborne Pathogens and its Application in Detection of Spiked Shiga Toxin-Producing Escherichia coli in Romaine Lettuce
Source: Research Square preprint supplement (doi:10.21203/rs.3.rs-6805163/v1), 2025-06-12
Supplement: Supplementary file 2 [file 7907c4c1e50455c2fd10131f.docx]

Table 2. Comparison of microbial species abundances from ZymoBIOMICS microbial Community DNA Standards using WMS and TAS methods

Abundance of microbial species detected using two sequencing methods: WMS and TAS. Species names are listed in the first column, followed by their corresponding normalized reads for WMS and TAS. The final column shows the GC content (%) of each species. Species marked with an asterisk (+) were included in the TAS panel.
